# Supplementary material for: Methamphetamine Induces Dopamine D1 Receptor-Dependent Endoplasmic Reticulum Stress-Related Molecular Events in the Rat Striatum
Source: PLoS One. 2009 Jun 30;4(6):e6092. doi: 10.1371/journal.pone.0006092 (PMC2699544; doi:10.1371/journal.pone.0006092)
Supplement: Table S4 — List of 372 SCH23390-resistant METH-responsive genes in the rat striatum. (0.12 MB XLS) [file pone.0006092.s004.xls]

## Sheet: Sheet1
Table S4. SCH23390-resistant METH-responsive genes in the rat striatum (372 genes).
					2h			4h
Gene Symbol	Accession No.	Gene Name	S / C	M / C	M + S / C	M + S / M		S / C	M / C	M + S / C	M + S / M
Apoptosis
Fgf4	NM_053809	fibroblast growth factor 4	1.49433	22.5258	8.13903	-2.76763		1.54102	1.1587	2.12979	1.83809
Gch1	NM_024356	GTP cyclohydrolase 1	1.11796	2.47545	1.48184	-1.67052		-1.45257	-1.46475	1.12245	1.64411
Sgk	NM_019232	serum/glucocorticoid regulated kinase	2.58103	2.24505	2.81733	1.25491		-1.03063	1.63734	1.21286	-1.34999
Tsc22d3	NM_031345	TSC22 domain family 3	1.59201	1.53097	2.06212	1.34693		-1.10506	1.70461	1.15926	-1.47044
Cmtm8	NM_198754	CKLF-like MARVEL transmembrane domain containing 8	1.11209	-1.89164	-1.51356	1.2498		-1.01498	-1.01559	-1.05318	-1.03701
Dnase1	NM_013097	deoxyribonuclease I	1.51177	-13.5156	-24.134	-1.78564		-1.06467	-2.68611	-1.60027	1.67854
Pycard	NM_172322	PYD and CARD domain containing	-13.0074	-83.6317	-157.562	-1.884		1.10894	-8.85149	-2.21436	3.99731
Catabolism
Fah	NM_017181	fasting-inducible integral membranerotein TM6P1	-1.12277	-1.28371	-1.18817	1.08041		-1.08871	-1.83024	-1.3891	1.31757
Gm2a	NM_172335	GM2 ganglioside activatorrotein	-1.23162	-1.35606	1.00301	1.36014		-1.11508	-1.75456	-1.04016	1.68682
Agmat	XM_216570	agmatine ureohydrolase (agmatinase)	-1.46057	-1.4588	-1.04244	1.3994		1.11369	-1.71505	-1.04696	1.63812
Tmem150	NM_139107	transmembranerotein 150	-1.2143	-1.60136	-1.50994	1.06055		-1.13674	-1.98934	-1.38673	1.43456
Cell Adhesion
Pkp2	XM_213560	plakophilin 2	2.08143	2.43309	1.66121	-1.46465		-1.05762	2.41759	1.92497	-1.25591
Ttll12	XM_235528	tubulin tyrosine ligase-like family, member 12	1.19324	2.38493	1.56404	-1.52486		-1.14401	1.13827	-1.09411	-1.24539
Efnb1	NM_017089	ephrin B1	1.81652	1.95794	1.63369	-1.19848		1.32581	1.63089	1.19632	-1.36325
Tnfrsf12a	NM_181086	tumor necrosis factor receptor superfamily, member 12a	-1.10846	1.90911	1.31988	-1.44642		-1.0203	1.80672	1.09758	-1.64609
Cbll1	XM_234039	Casitas B-lineage lymphoma-like 1	1.13435	1.15394	1.29155	1.11925		-1.28479	1.84327	1.28783	-1.43129
Tecta	XM_236124	tectorin alpha	-1.20693	-1.04923	-1.76082	-1.6782		-1.34892	-2.52326	-1.98057	1.27401
Cldn12	XM_231402	claudin 12	-1.02062	-1.32162	-1.36903	-1.03587		-1.02048	-1.72973	-1.1951	1.44735
Scarf2	XM_237825	scavenger receptor class F, member 2	1.07427	-1.33619	-1.2911	1.03492		1.06622	-1.74816	-1.07726	1.62279
Cntn2	NM_012884	contactin 2	-1.26844	-1.40599	-1.48781	-1.05819		-1.07277	-2.29845	-1.62657	1.41307
Lpxn	NM_001009649	leupaxin	-1.26029	-1.63396	-1.36375	1.19814		-1.0663	-1.72369	-1.0673	1.61499
Thsd1	XM_344542	thrombospondin, type I, domain 1	-1.0897	-1.70643	-1.44232	1.18312		1.06991	1.12096	1.05138	-1.06618
Mcam	NM_023983	melanoma cell adhesion molecule	-1.56827	-1.70964	-1.42186	1.2024		1.1497	-1.38899	-1.54789	-1.1144
Cx3cr1	NM_133534	chemokine (C-X3-C) receptor 1	-1.64119	-1.88186	-1.37074	1.37288		-1.02391	-1.22262	-1.13031	1.08167
Krt-7	XM_217035	keratin 7	-1.64127	-1.99579	-2.50011	-1.25269		-2.18116	2.10395	-2.44965	-5.15393
Cldn5	NM_031701	claudin 5	-1.22736	-2.4025	-1.58233	1.51833		1.05184	-1.28986	-1.14223	1.12924
Icam2	NM_001007725	intercellular adhesion molecule 2	-1.61057	-3.5441	-2.36025	1.50158		-1.01853	-2.39989	-1.54225	1.55609
Impg1	NM_023958	interphotoreceptor matrixroteoglycan 1	-1.51447	-13.9575	-4.4608	3.12891		-1.92219	-3.77282	1.88532	7.11296
Amica1	XM_236198	adhesion molecule, interacts with CXADR antigen 1	-1.62002	-19.0358	-2.30251	8.26742		4.4752	-1.06044	-2.10786	-1.98771
Cell Cycle
Cdkn1a	NM_080782	cyclin-dependent kinase inhibitor 1A	6.32304	13.2504	12.7223	-1.04151		3.43384	32.8672	38.8497	1.18202
Cdk6	XM_342638	cyclin-dependent kinase 6	1.21487	2.46201	1.66405	-1.47953		-1.02136	1.46209	-1.04713	-1.53099
Ptgs2	NM_017232	prostaglandin-endoperoxide synthase 2	-1.0101	2.35924	1.5129	-1.55942		-1.09681	1.39491	1.12236	-1.24284
Per1	XM_340822	period homolog 1 (Drosophila)	-1.23054	2.16757	1.34064	-1.61682		-1.17004	1.40059	1.03083	-1.35869
Rgs2	NM_053453	regulator of G-protein signaling 2	-1.53098	2.0017	1.19226	-1.67891		-1.21567	1.11427	-1.0471	-1.16675
Ppm1d	XM_213418	proteinhosphatase 1D magnesium-dependent, delta isoform	1.23796	1.81	1.28631	-1.40713		-1.05609	-1.05109	-1.04891	1.00208
Cul2	XM_341542	cullin 2	-1.21069	-1.2917	-1.65858	-1.28403		-1.04153	-1.75435	-1.26706	1.38458
Cdk10	XM_341712	cyclin-dependent kinase (CDC2-like) 10	-1.08171	-1.49598	-1.65582	-1.10685		-1.2042	-1.91141	-1.29201	1.4794
Ttk	XM_236477	Ttkrotein kinase	-1.35982	-1.91048	-2.36935	-1.24019		-1.06286	-1.69755	-1.27853	1.32774
S100a11	XM_215598	S100 calcium bindingrotein A11 (calizzarin)	-1.91831	-2.04503	-1.86092	1.09893		-1.02801	1.04143	-1.04922	-1.09268
Terf1	XM_238387	telomeric repeat binding factor 1	1.42435	-2.29121	-4.01789	-1.75361		-1.08064	-2.11377	-1.85207	1.1413
Cell Differentiation OR Development
Slc5a3	NM_053715	solute carrier family 5 (inositol transporters), member 3	1.0844	3.2868	2.22315	-1.47844		1.1262	2.61025	1.54025	-1.6947
Verge	XM_579097	vascular early response generotein	-1.01589	2.60689	1.95677	-1.33224		1.00413	1.38009	1.35578	-1.01793
Adamts9	XM_232202	a disintegrin-like and metalloprotease motif, 9	-1.25561	2.45853	2.04388	-1.20288		-2.35498	1.41964	-1.15175	-1.63506
Mcl1	NM_021846	myeloid cell leukemia sequence 1	1.10526	2.4384	1.49085	-1.63558		-1.01668	1.72099	1.32061	-1.30318
Lrrc8c	XM_213999	leucine rich repeat containing 8 family, member C	-1.24325	1.81637	1.07767	-1.68546		-1.33235	1.28767	1.07446	-1.19844
Pdlim7	NM_173125	PDZ and LIM domain 7	-1.01882	1.21262	1.25094	1.0316		1.09638	2.08302	1.38465	-1.50437
Polr3e	XM_341919	polymerase (RNA) III (DNA directed)olypeptide E	1.04658	-1.2272	-1.27886	-1.0421		-1.02453	-1.70591	-1.22698	1.39034
Fjx1	XM_345408	four jointed box 1 (Drosophila)	-1.19683	-1.26548	-1.63082	-1.28869		-1.00857	-1.71558	-1.19315	1.43786
Gli1	XM_345832	GLI-Kruppel family member GLI1	-1.23036	-1.30123	-1.43189	-1.10041		1.05153	-1.79126	-1.23226	1.45363
Itm2a	XM_228493	integral membranerotein 2A	-1.31885	-1.54218	-1.51081	1.02076		1.0052	-1.82374	-1.59004	1.14697
Hsd3b7	NM_139329	hydroxy-δ-5-steroid dehydrogenase,3 β steroid δ-isomerase 7	-1.21782	-1.55948	-1.49767	1.04127		-1.10376	-1.87189	-1.187	1.577
Ca4	NM_019174	carbonic anhydrase 4	-1.54241	-1.57278	-2.04876	-1.30263		1.39829	-2.19826	-1.51165	1.45421
Rab3d	NM_080580	RAB3D, member RAS oncogene family	-1.51335	-1.93038	-2.11227	-1.09423		1.10225	-1.96685	-1.17155	1.67884
Sfrp2	XM_227314	secreted frizzled-relatedrotein 2	-1.83606	-2.00401	-2.11414	-1.05496		-1.09171	-1.09293	-1.10615	-1.01209
Col3a1	NM_032085	procollagen, type III, alpha 1	-1.87935	-2.38896	-1.52639	1.56511		1.45006	1.31948	1.44771	1.09718
Csrp2	NM_177425	cysteine and glycine-richrotein 2	-1.10893	-2.57838	-2.41154	1.06919		1.01673	-1.62775	-1.42443	1.14274
Gja4	NM_021654	gap junction membrane channelrotein alpha 4	-1.23114	-3.21208	-2.22947	1.44074		-1.03543	-1.75724	-1.43629	1.22346
Cell Migration
PVR	NM_017076	poliovirus receptor	-1.13506	2.02652	1.38126	-1.46715		-1.06372	1.73211	1.237	-1.40025
Tmtc3	XM_235093	transmembrane and tetratricopeptide repeat containing 3	2.00619	1.98923	1.44935	-1.3725		-1.46987	-1.57505	-2.6016	-1.65176
Golph3	NM_023977	golgihosphoprotein 3	1.17517	1.49071	1.20652	-1.23554		-1.22597	1.70855	1.31811	-1.29621
Kpna4	XM_342260	karyopherin (importin) alpha 4	1.09927	1.33142	-1.00073	-1.33239		1.14967	1.82372	1.35512	-1.3458
Dnalc4	NM_001009666	dynein, axonemal, light chain 4	-1.51093	-1.70851	-1.34544	1.26985		-1.04728	-1.38	-1.18944	1.1602
Tie1	XM_233462	tyrosine kinase with immunoglobulin-like and EGF-like domains 1	-1.16349	-1.78408	-1.50575	1.18484		1.06444	-1.24365	-1.25633	-1.01019
Tie1	XM_233462	tyrosine kinase with immunoglobulin-like and EGF-like domains 1	-1.61903	-1.84173	-1.96938	-1.06931		-1.03222	-1.94243	-1.67749	1.15793
Dnah1	XM_224615	dynein, axonemal, heavyolypeptide 1	-1.44851	-2.24138	-2.08432	1.07535		-1.20017	-1.12662	-1.2177	-1.08084
Egfl7	NM_139104	EGF-like domain 7	-1.48798	-4.02502	-2.569	1.56676		1.02536	-1.49157	-1.20197	1.24094
Cellular Transport
Rgs1	XM_344150	regulator of G-protein signaling 1	8.01317	46.4185	35.1786	-1.31951		-2.22411	2.40249	-2.61957	-6.2935
Slc39a12	XM_225586	solute carrier family 39 (zinc transporter), member 12	1.60402	4.65311	4.41482	-1.05397		-1.45139	-1.00446	-1.12726	-1.12225
Tnpo1	XM_219500	transportin 1	1.15639	2.18876	1.422	-1.53921		1.26293	2.19982	1.31317	-1.6752
Rasd1	XM_340809	RAS, dexamethasone-induced 1	1.72837	1.69714	1.33352	-1.27268		-1.19734	1.73916	1.17044	-1.4859
Cacnb4	XM_215742	calcium channel, voltage-dependent, beta 4 subunit	1.29671	1.37921	1.0412	-1.32463		-1.17584	1.85033	1.10305	-1.67746
Kctd14	XM_218935	potassium channel tetramerisation domain containing 14	1.54659	1.1744	1.66673	1.41921		1.03725	1.8614	1.33944	-1.38968
Kcnj14	NM_170718	potassium inwardly-rectifying channel, subfamily J, member 14	-1.26885	1.15142	1.12893	-1.01992		-1.13205	1.73785	1.1673	-1.48878
Exoc7	NM_022691	exocyst complex component 7	-1.15297	-1.12654	-1.31249	-1.16507		-1.11564	-1.79998	-1.23553	1.45684
Syt3	NM_019122	synaptotagmin III	-1.26559	-1.18087	-1.19448	-1.01152		-1.07579	-1.71413	-1.24622	1.37546
Bspry	NM_022261	B-box and SPRY domain containing	-1.28844	-1.22082	-1.26608	-1.03708		-1.14557	-2.51401	-1.69474	1.48342
P2rx4	NM_031594	purinergic receptor2X, ligand-gated ion channel 4	1.13592	-1.24352	-1.08168	1.14962		1.17217	-1.91525	-1.3516	1.41703
Slc29a3	NM_181639	solute carrier family 29 (nucleoside transporters), member 3	-1.10455	-1.27203	-1.27899	-1.00547		-1.19325	-1.86606	-1.4894	1.25289
Abca8b	XM_221074	ATP-binding cassette, sub-family A (ABC1), member 8b	-1.01931	-1.31967	-1.23332	1.07001		1.17375	-1.77811	-1.05794	1.68072
Slc39a3	NM_001008356	solute carrier family 39 (zinc transporter), member 3	-1.25234	-1.33925	-1.60766	-1.20042		-1.07818	-2.06894	-1.32684	1.5593
Lgi3	XM_224337	leucine-rich repeat LGI family, member 3	-1.26732	-1.40726	-1.34378	1.04724		1.01737	-1.8718	-1.20314	1.55576
Lrrc28	XM_341870	leucine rich repeat containing 28	1.16615	-1.4092	-1.76888	-1.25524		-1.21605	-1.75497	-2.22958	-1.27044
Mfi2	XM_237839	antigen97 identified by monoclonal antibodies 133.2 and 96.5	-1.10344	-1.51099	-1.161	1.30145		-1.12521	-1.78281	-1.21851	1.46311
Mss4	NM_001007678	Mss4rotein	-1.18144	-1.51688	-1.47007	1.03184		-1.08981	-1.97291	-1.29321	1.52559
Slc38a5	NM_138854	solute carrier family 38, member 5	-1.4866	-1.64344	-1.97999	-1.20478		-1.00306	-2.33148	-2.11869	1.10044
Rwdd3	XM_342332	RWD domain containing 3	-1.23739	-1.7239	-1.39026	1.23999		-1.1007	-1.76138	-1.15988	1.51859
Abcg2	NM_181381	ATP-binding cassette, sub-family G (WHITE), member 2	1.16419	-1.79912	-1.69939	1.05869		-1.05671	-2.25505	-2.35598	-1.04476
Slc40a1	NM_133315	solute carrier family 39 (iron-regulated transporter), member 1	-1.01598	-2.0847	-2.10316	-1.00886		1.01927	-1.12877	-1.28125	-1.13509
Slco2b1	NM_080786	solute carrier organic anion transporter family, member 2b1	-1.33805	-2.12644	-1.31668	1.615		1.00186	-1.89151	-1.56617	1.20773
Slc6a13	NM_133623	solute carrier family 6 (GABA transporter), member 13	-1.77059	-2.27969	-2.76277	-1.21191		-1.10969	-2.27021	-1.57807	1.4386
Slc16a13	NM_001005530	solute carrier family 16 (COOH transporters) mem 13	-1.20493	-2.39973	-2.29511	1.04558		-1.15471	-1.99667	-1.10977	1.79919
Slc16a11	XM_213334	solute carrier family 16 (COOH transporters), member 11	-1.86355	-2.45197	-2.10505	1.1648		-1.21956	-2.30159	-1.69944	1.35432
Slc22a13	XM_236685	solute carrier family 22 (organic cation transporter), member 13	-12.1397	-3.58583	-2.29206	1.56446		-1.31429	-1.77109	-1.82626	-1.03115
Lgals9	NM_012977	lectin, galactose binding, soluble 9	-23.0807	-41.9262	-25.4603	1.64673		-2.09086	-3.66731	-8.20796	-2.23814
Electron Transport
Steap1	XM_216315	six transmembrane epithelial antigen of therostate 1	12.0963	15.2214	3.63928	-4.18252		13.7964	69.2828	76.1913	1.09971
Fmo2	NM_144737	flavin containing monooxygenase 2	1.91524	1.77204	2.05327	1.1587		-1.2502	2.60525	1.57797	-1.65102
Cyp4f4	NM_173123	cytochrome450, family 4, subfamily f,olypeptide 4	1.00853	-1.35769	-1.4175	-1.04405		1.01401	-1.76892	-1.22747	1.44111
Cyp2t1	NM_134369	cytochrome450 monooxygenase CYP2T1	1.46651	-2.32804	-1.65953	1.40283		-1.12969	-1.91886	-1.28812	1.48967
ER Stress
Plekhf1	XM_218543	pleckstrin homology domain containing, family F member 1	1.50583	2.94177	2.63623	-1.1159		1.01535	1.61831	1.23783	-1.30738
Dnajb4	NM_001013076	DnaJ (Hsp40) homolog, subfamily B, member 4	1.23527	2.82855	1.95327	-1.44811		1.09397	2.0918	1.39041	-1.50445
Ddit4 (REDD1)	NM_080906	DNA-damage-inducible transcript 4	1.52304	2.67778	3.05863	1.14223		-1.14384	1.45473	1.21781	-1.19455
Hspca(HSP90)	NM_175761	heat shockrotein 1, alpha	1.17084	1.90779	1.38278	-1.37968		-1.06061	1.60432	1.01221	-1.58497
Dnaja4	XM_217147	DnaJ (Hsp40) homolog, subfamily A, member 4	1.11478	1.86235	1.25005	-1.48982		-1.00345	1.64652	-1.00251	-1.65065
Casp2	NM_022522	caspase 2	-1.10921	1.72182	1.16294	-1.48058		1.00502	1.22631	-1.05354	-1.29197
Dnajc3	NM_022232	DnaJ (Hsp40) homolog, subfamily C, member 3	1.26566	1.18458	1.28553	1.08522		-1.04052	1.72589	1.04594	-1.65008
Xbp1	NM_001004210	X-box bindingrotein 1	1.3921	1.15383	1.39302	1.20731		-1.07259	1.7229	1.07155	-1.60786
Phldb1	XM_576401	pleckstrin homology-like domain, family B, member 1	-1.31264	-1.20026	-1.46696	-1.2222		-1.14631	-1.94358	-1.58573	1.22567
Carhsp1	NM_152790	calcium regulated heat stablerotein 1	-1.0954	-1.21694	-1.23354	-1.01365		-1.14514	-1.83312	-1.37097	1.3371
Plekhj1	XM_234909	pleckstrin homology domain containing, family J member 1	-1.37981	-1.43016	-1.48807	-1.04049		-1.04644	-2.06014	-1.21562	1.69473
Hspa12b	XM_230610	heat shockrotein 70kDa 12B	-1.08328	-3.2432	-1.61776	2.00474		-1.06813	-1.23254	-1.06696	1.15519
Hormone Response
Crh	NM_031019	corticotropin releasing hormone	11.8697	39.3676	30.5583	-1.28828		-1.2453	38.7039	32.0238	-1.2086
Ikbkap	NM_080899	inhibitor of kappa lightolypeptide enhancer in B-cells	1.25491	1.3636	1.3047	-1.04515		1.2337	1.83809	1.11484	-1.64874
Ccl5	NM_031116	chemokine (C-C motif) ligand 5	-1.11716	-1.09072	-1.00761	1.08248		-1.20743	-1.87621	-1.5229	1.23199
C8g	XM_215990	complement component 8, gammaolypeptide	-1.08515	-1.16928	-1.14993	1.01683		-1.04902	-1.99017	-1.55456	1.28022
C4bpb	NM_016995	complement component 4 bindingrotein, beta	-1.12935	-2.08592	-1.3982	1.49186		1.1607	-1.1171	-1.04376	1.07027
Hcrt	NM_013179	hypocretin	-4.13543	-67.3932	-40.2073	1.67614		-2.53048	4.08526	1.10987	-3.68085
Immune Response
Cdr2	XM_219291	cerebellar degeneration-related 2	1.06159	1.47458	1.18036	-1.24927		-1.03659	1.8404	1.20742	-1.52425
Ifitm6	XM_219476	interferon induced transmembranerotein 6	1.05149	-1.36209	-1.14021	1.1946		-1.088	-1.98943	-1.4141	1.40685
Prom1	NM_021751	prominin 1	-1.13758	-1.58006	-1.88241	-1.19135		-1.00614	-1.88872	-1.76646	1.06921
Sigirr	XM_219479	single immunoglobulin and toll-interleukin1 receptor domain	-1.44949	-4.64604	-1.70881	2.71888		1.04679	-1.34435	1.05322	1.4159
Metabolism
Ftcd	NM_053567	formiminotransferase cyclodeaminase	2.27104	2.28226	1.86815	-1.22167		1.3352	-1.40701	-1.09497	1.28498
Ndst3	XM_227665	N-deacetylase/N-sulfotransferase (heparan glucosaminyl) 3	1.6264	1.70627	1.03024	-1.65619		-3.04583	-1.23688	-3.45837	-2.79605
Phkg1	NM_031573	phosphorylase kinase gamma 1	-1.04358	1.23173	1.02212	-1.20508		-1.27528	-1.91028	-1.18887	1.60681
Pspla1	NM_138882	phosphatidylserine-specifichospholipase A1	1.35267	1.18112	1.88875	1.59912		-1.04516	1.77646	1.46061	-1.21624
Upp1	XM_214096	uridinehosphorylase 1	1.19101	1.15252	1.80178	1.56333		-1.01278	2.07171	1.3977	-1.48222
Qprt	BC088177	quinolinatehosphoribosyltransferase	-1.17458	1.00345	-1.12307	-1.12694		-1.15445	-1.7252	-1.32357	1.30345
Qprt	NM_001009646	quinolinatehosphoribosyltransferase	-1.22712	-1.1035	-1.19096	-1.07926		-1.1478	-1.86328	-1.3426	1.38782
Blm	XM_218837	Bloom syndrome homolog (human)	-1.02282	-1.12678	-1.22857	-1.09034		-1.04574	-1.80011	-1.13823	1.58149
Asl	NM_021577	argininosuccinate lyase	-1.0322	-1.23114	1.05705	1.30138		-1.19208	-1.79791	-1.20596	1.49085
Galk1	NM_001008282	galactokinase 1	-1.34073	-1.28426	-1.5235	-1.18629		-1.06979	-1.80778	-1.2133	1.48997
Adpgk	XM_236306	ADP-dependent glucokinase	1.12166	-1.30024	-1.37546	-1.05786		1.06388	-2.20713	-1.51548	1.45639
Tdh	XM_214217	L-threonine dehydrogenase	-1.28082	-1.3505	-1.44672	-1.07125		-1.00606	-1.77532	-1.1822	1.50171
Cte1	NM_031315	cytosolic acyl-CoA thioesterase 1	-1.36686	-1.40861	-1.84801	-1.31194		-1.24606	-2.00208	-1.41667	1.41323
Ltc4s	NM_053639	leukotriene C4 synthase	-1.44672	-1.56199	-1.79441	-1.1488		-1.15679	-1.97957	-1.30544	1.5164
Abcc6	NM_031013	ATP-binding cassette, sub-family C (CFTR/MRP), member 6	-1.41351	-1.57683	-1.59804	-1.01345		1.14012	-3.42417	-2.55711	1.33908
Adck5	XM_343273	aarF domain containing kinase 5	-1.2557	-1.60048	-1.55297	1.0306		1.00777	-1.73274	-1.15727	1.49727
Ndst2	XM_223793	N-deacetylase/N-sulfotransferase (heparan glucosaminyl) 2	-1.32498	-1.89124	-1.41363	1.33786		-1.0587	-1.1944	-1.31818	-1.10363
Faah	NM_024132	fatty acid amide hydrolase	-1.13222	-1.92693	-2.22451	-1.15444		-1.02389	-1.94134	-1.5225	1.2751
Ddx58	XM_216380	DEAD (Asp-Glu-Ala-Asp) boxolypeptide 58	-1.32605	-2.03616	-2.31422	-1.13656		1.3341	-1.05168	1.26094	1.32611
St8sia6	NM_213624	ST8 alpha-N-acetyl-neuraminide alpha-2,8-sialyltransferase 6	-1.31885	-3.06139	-3.04211	1.00634		-1.4785	1.37719	-1.25282	-1.72537
B3galt4	NM_133553	beta 1,3-galactosyltransferase,polypeptide 4	-2.93661	-5.09845	-3.36125	1.51683		-1.1374	-2.13078	-1.38237	1.5414
Metal-ion binding
Phf13	XM_233700	PHD fingerrotein 13	1.04502	2.0007	1.63694	-1.22222		1.03806	-1.02811	-1.12025	-1.08962
Pcgf6	XM_219963	polycomb group ring finger 6	-1.1331	-1.75234	-1.44746	1.21063		-1.20042	-1.36888	-1.38544	-1.0121
Toe1	XM_216504	target of EGR1, member 1 (nuclear)	-1.23433	-1.88954	-1.56194	1.20974		-1.34241	-1.59804	-1.09336	1.46159
Pqlc2	XM_342958	PQ loop repeat containing 2	-2.15723	-2.10167	-5.32358	-2.53303		-1.50664	-2.09419	-1.65433	1.26589
Haghl	XM_220251	hydroxyacylglutathione hydrolase-like	-1.50899	-3.31135	-2.04805	1.61683		-1.24101	-2.00485	-1.18472	1.69226
Mitochondria
Pdk4	NM_053551	pyruvate dehydrogenase kinase, isoenzyme 4	6.29357	25.0625	22.9719	-1.091		1.45282	12.848	1.71222	-7.50372
Nhlrc2	XM_217640	NHL repeat containing 2	-1.18085	1.71463	1.40461	-1.22072		-1.17841	1.04365	-1.58736	-1.65665
Nucleotide Binding
Hist1h4b	NM_022686	histone cluster 1, H4b	1.03778	32.8221	5.75725	-5.701		2.95089	16.7447	16.9871	1.01448
Xrn1	XM_217233	5'-3' exoribonuclease 1	-1.29089	2.07339	1.33112	-1.55763		-1.29769	1.26388	-1.13213	-1.43087
Cggbp1	XM_213679	CGG triplet repeat bindingrotein 1	1.16337	2.03996	1.40569	-1.45121		-1.12304	1.45255	1.00206	-1.44957
Rab30	XM_218916	RAB30, member RAS oncogene family	1.02514	1.98788	1.41107	-1.40878		-1.11999	1.36156	1.04743	-1.29991
Irak2	XM_342739	interleukin-1 receptor-associated kinase 2	1.04899	1.3797	1.19806	-1.1516		1.16791	1.764	1.15468	-1.52769
Eif1a	NM_001008773	eukaryotic translation initiation factor 1A	1.14507	1.30987	1.30217	-1.00592		-1.0908	1.7476	1.10874	-1.57619
Rsn	NM_031745	restin	1.17447	1.04096	-1.02014	-1.06192		1.03419	1.81611	1.50245	-1.20876
Cirbp	NM_031147	cold inducible RNA bindingrotein	-1.27391	-1.19888	-1.23528	-1.03036		-1.12643	-1.7599	-1.1972	1.47002
Ddx52	NM_053525	DEAD (Asp-Glu-Ala-Asp) boxolypeptide 52	1.18763	-1.20094	-1.22085	-1.01658		1.01503	-1.8341	-1.15275	1.59106
R3hcc1	XM_341347	R3H domain and coiled-coil containing 1	-1.23221	-1.31655	-1.37969	-1.04796		-1.08292	-1.82092	-1.2721	1.43142
Rad52	XM_216230	RAD52 homolog (S. cerevisiae)	1.0523	-1.4006	-1.32572	1.05648		-1.00497	-1.70501	-1.14859	1.48444
Mpg	NM_012601	N-methylpurine-DNA glycosylase	-1.67495	-1.41785	-2.24586	-1.58399		1.01248	-2.02982	-1.37626	1.47488
Ogg1	NM_030870	8-oxoguanine DNA-glycosylase 1	-1.0073	-1.44898	-3.88356	-2.6802		-1.2783	-1.99984	-1.49948	1.33369
Sars2	XM_214884	seryl-tRNA synthetase 2	-1.43019	-1.53322	-1.38195	1.10946		-1.05044	-1.85476	-1.10998	1.67099
Mutyh	NM_133316	mutY homolog (E. coli)	-1.17016	-1.62745	-1.25278	1.29907		-1.07568	-1.77296	-1.3123	1.35103
Alg1	XM_340750	asparagine-linked glycosylation 1 homolog	-1.33594	-1.71324	-1.80404	-1.053		-1.21258	-1.51487	-1.09327	1.38563
Nthl1	XM_213228	nth (endonuclease III)-like 1 (E.coli)	-1.34778	-1.75908	-1.23448	1.42495		-1.00565	-1.71093	-1.48074	1.15545
Igf2bp3	XM_231739	insulin-like growth factor 2, bindingrotein 3	-1.32975	-2.27302	-1.21895	1.86473		-1.11802	-2.39331	-1.71386	1.39644
Sox17	XM_232640	SRY-box containing gene 17	-1.03268	-2.2788	-1.90026	1.1992		-1.10424	-1.39621	-1.2402	1.1258
Nbeal2	XM_236649	neurobeachin-like 2	-1.39311	-2.39268	-1.69956	1.40782		1.03869	-1.17348	-1.15818	1.01321
Rpusd3	XM_342737	RNAseudouridylate synthase domain containing 3	-1.08688	-2.57113	-2.71344	-1.05535		-1.0804	-2.48868	-1.32123	1.88361
Protein-protein interaction
Ankrd16	XM_225535	ankyrin repeat domain 16	-1.15985	-1.40679	-1.19455	1.17768		-1.08303	-1.83829	-1.24889	1.47194
Protein oligomerization
C1qtnf7	XM_223507	C1q and tumor necrosis factor relatedrotein 7	-18.1413	-23.5848	-11.6153	2.0305		1.02557	-1.69106	-1.87603	-1.10938
Signal Transduction
Pmch	NM_012625	pro-melanin-concentrating hormone	106.895	24.0086	13.7066	-1.75161		-11.7561	-77.6608	-3.76964	20.6017
Gpr65	XM_234367	G-protein coupled receptor 65	4.85424	20.6958	4.6765	-4.4255		4.75099	4.52132	1.44355	-3.13208
Oxt	NM_012996	oxytocin	22.4483	16.0776	5.12133	-3.13934		-5.92277	-83.8553	-13.2199	6.34313
Avp	NM_016992	arginine vasopressin	6.60965	5.38381	7.01889	1.3037		-4.24097	-28.8424	-4.38243	6.58137
Pard6g	XM_225733	par-6artitioning defective 6 homolog gamma (C. elegans)	3.1006	3.8163	2.24872	-1.6971		-24.3349	-24.4893	-10.6961	2.28956
Ttn	XM_575155	titin	2.60924	3.11061	2.45709	-1.26597		-1.01524	-1.48511	-1.32829	1.11806
Sertad1	NM_001007735	SERTA domain containing 1	1.22226	3.03023	2.08944	-1.45026		1.08984	1.45762	1.20041	-1.21427
Irs3	NM_032074	insulin receptor substrate 3	1.75004	2.65929	2.09426	-1.2698		1.09285	2.39235	2.12062	-1.12814
Gadd45b	NM_001008321	growth arrest and DNA-damage-inducible 45 beta	1.29223	2.62915	2.18262	-1.20459		1.15199	2.03653	1.19878	-1.69883
Mc4r	NM_013099	melanocortin 4 receptor	1.4943	2.09997	1.70006	-1.23523		-1.35259	1.0404	-1.06613	-1.1092
Htr1f	NM_021857	5-hydroxytryptamine (serotonin) receptor 1F	-1.17919	2.03514	1.33689	-1.5223		-1.01819	1.17538	1.11113	-1.05783
Plat	NM_013151	plasminogen activator, tissue	-1.09598	1.87977	1.81935	-1.03321		1.03656	1.66702	1.62481	-1.02598
Dusp5	NM_133578	dual specificityhosphatase 5	-1.20556	1.84289	1.17701	-1.56573		-1.24489	1.1805	-1.1151	-1.31637
Map2k3	XM_239239	mitogen activatedrotein kinase kinase 3	1.03613	1.83268	1.26583	-1.44781		-1.00093	1.8574	1.16551	-1.59363
Gpr19	XM_232475	Grotein-coupled receptor 19	1.09256	1.81209	1.3296	-1.36289		-1.04602	-1.08036	1.00302	1.08362
Mylk	XM_213611	myosin, lightolypeptide kinase	1.14699	1.76718	2.05953	1.16543		-21.3248	-14.9793	-11.347	1.32011
Dusp11	XM_216196	dual specificityhosphatase11(RNA/RNP complex 1-interacting)	1.02111	1.75069	1.39204	-1.25764		-1.15276	1.41187	1.00941	-1.39871
Gpr4	XM_218415	Grotein-coupled receptor 4	-1.23362	1.67628	1.70858	1.01927		1.0639	1.704	1.27353	-1.33801
Lgr4	NM_173328	leucine-rich repeat-containing Grotein-coupled receptor 4	1.34466	1.64775	1.33472	-1.23453		-1.07984	1.96853	1.23476	-1.59426
Ltbp1	NM_021587	latent transforming growth factor beta bindingrotein 1	1.5275	1.50744	-3.99741	-6.02586		-1.81136	-19.27	-4.39851	4.38103
Crkl	NM_001008284	v-crk sarcoma virus CT10 oncogene homolog (avian)-like	1.09712	1.50715	1.363	-1.10576		1.11944	1.78669	1.1816	-1.5121
Fgf2	NM_019305	fibroblast growth factor 2	-1.01033	1.44607	1.35359	-1.06832		1.28439	1.84967	1.45373	-1.27236
Trio	XM_226888	triple functional domain (PTPRF interacting)	1.12352	1.35469	1.20506	-1.12417		1.0011	1.90523	1.27962	-1.4889
Txndc1	XM_343076	thioredoxin domain containing 1	1.28296	1.16022	1.21352	1.04594		-1.01885	1.75448	1.22401	-1.43339
Oxgr1	NM_207588	oxoglutarate (alpha-ketoglutarate) receptor 1	1.02178	1.1343	1.58665	1.39879		16.6726	20.5891	36.0127	1.74912
Spred1	XM_230454	sproutyrotein with EVH-1 domain 1, related sequence	-1.1916	1.11764	-1.021	-1.14111		-1.20881	1.75735	1.08618	-1.61792
Olr59	NM_173293	olfactory receptor 59	1.10964	1.01943	-1.22855	-1.25242		1.38382	-1.96844	-1.25774	1.56506
Olr1724	NM_001000277	olfactory receptor 1724	1	1	1	1		5.85188	36.2978	4.66169	-7.7864
Gabrr3	NM_138897	gamma-aminobutyric acid (GABA) receptor, rho 3	1.66825	-1.02021	-1.19002	-1.16644		1.40085	26.9096	3.65359	-7.36526
Nkd1	XM_344728	naked cuticle 1 homolog (Drosophila)	-1.35682	-1.02868	-1.57841	-1.53441		1.03102	-1.76296	-1.4247	1.23743
Trem2	XM_217335	triggering receptor expressed on myeloid cells 2	-1.14571	-1.11523	-1.29663	-1.16265		1.10157	-1.77827	-1.36683	1.30102
Tmem63a	XM_223000	transmembranerotein 63a	1.03414	-1.2159	-1.22993	-1.01154		-1.06918	-1.7231	-1.26616	1.36088
Ltk	XM_230479	leukocyte tyrosine kinase	-1.04124	-1.24317	-1.25012	-1.00559		-1.50077	-2.20867	-1.97231	1.11984
Ppp1r14a	NM_130403	proteinhosphatase 1, regulatory (inhibitor) subunit 14A	-1.51068	-1.27427	-1.49871	-1.17613		-1.15922	-2.19625	-1.584	1.38652
Adck2	XM_231655	aarF domain containing kinase 2	-1.10374	-1.32973	-1.50522	-1.13197		-1.11788	-1.90888	-1.30909	1.45817
Sarm1	XM_213404	sterile alpha and TIR motif containing 1	-1.06312	-1.47392	-1.33765	1.10187		1.02623	-1.76427	-1.20031	1.46985
Aurkc	XM_214811	aurora kinase C	-1.24243	-1.47798	-1.50717	-1.01975		-1.12266	-1.98976	-1.28975	1.54275
Lyk5	NM_182820	protein kinase LYK5	-1.4459	-1.60401	-1.38049	1.16192		-1.1505	-2.02045	-1.23491	1.63612
Rhbdf1	XM_220267	rhomboid family 1 (Drosophila)	-1.8735	-1.71846	-2.22623	-1.29548		-1.13787	-1.19233	-1.3612	-1.14163
Ramp2	NM_031646	receptor (calcitonin) activity modifyingrotein 2	-1.24425	-1.75784	-1.36112	1.29147		1.01288	-1.35435	-1.06774	1.26842
Gal	NM_033237	galanin	-1.23426	-1.76858	-1.26677	1.39613		1.0496	1.134	1.20831	1.06553
Pthr1	NM_020073	parathyroid hormone receptor 1	-1.35827	-1.81243	-2.12496	-1.17244		1.04517	-1.71293	-1.39774	1.22551
Tacstd1	NM_138541	tumor-associated calcium signal transducer 1	-1.27888	-1.8314	-1.72217	1.06343		1.16412	-1.15087	-1.39433	-1.21154
Adora3	NM_012896	adenosine A3 receptor	-1.34824	-1.89382	-1.52203	1.24427		-1.11156	-1.51683	-1.35479	1.1196
P2rxl1	NM_012721	purinergic receptor2X-like 1, orphan receptor	-1.18692	-1.93556	-1.63905	1.1809		-1.09047	-1.48697	-1.04388	1.42446
Tmem15	XM_231121	transmembranerotein 15	-1.21491	-1.98013	-1.21012	1.63631		-1.12042	-1.58006	-1.18073	1.3382
Tmem8	XM_220264	transmembranerotein 8 (five membrane-spanning domains)	-1.29871	-1.99161	-1.91861	1.03805		-1.30989	-1.88409	-1.31783	1.42969
Slc9a3r2	NM_053811	solute carrier family 9, isoform 3 regulator 2	-1.09261	-2.08177	-1.45508	1.43069		-1.18024	-1.52662	1.03748	1.58384
Agtrl1	NM_031349	angiotensin receptor-like 1	-1.69884	-2.27634	-2.4645	-1.08266		-1.08808	-1.56423	-1.17358	1.33287
Ccr5	NM_053960	chemokine (C-C motif) receptor 5	-1.01032	-2.34345	-2.24316	1.04471		-1.21717	-1.60366	-1.48396	1.08066
Spag8	XM_342826	sperm associated antigen 8	-1.09752	-2.54577	-2.30947	1.10232		-1.06533	-1.1897	1.00174	1.19177
Pamci	NM_022959	peptidylglycine α-amidating monooxygenase C-terminal interactor	-1.14514	-2.61902	-4.15504	-1.58649		1.1624	-1.47575	-1.33723	1.10358
Tas1r1	XM_342986	taste receptor, type 1, member 1	-4.33003	-2.71417	-1.07463	2.52568		-1.03044	-23.8419	-4.85027	4.91558
Tlr2	NM_198769	toll-like receptor 2	-1.61627	-3.23309	-3.64409	-1.12712		1.00552	-2.18214	-1.57968	1.38138
Hrc	NM_181369	histidine rich calcium bindingrotein	-6.25679	-3.47914	-2.09337	1.66198		1.05899	-1.70494	-2.45113	-1.43767
Structural
Pemt	XM_343906	phosphatidylethanolamine N-methyltransferase	-2.31505	-1.62902	-1.96983	-1.20921		-1.15248	-2.4473	-1.48439	1.64869
Nrm	NM_212508	nurim (nuclear envelope membranerotein)	-1.55512	-3.2158	-1.84773	1.74041		1.02528	-1.23593	-1.15667	1.06853
Prg4	XM_213903	proteoglycan 4	-10.0301	-35.9254	-7.33443	4.89818		9.83398	2.87793	1.77906	-1.61767
Transcription
Maff	XM_345857	v-maf musculoaponeurotic fibrosarcoma oncogene family	1.60518	51.9536	36.8198	-1.41103		1	1.18443	1	-1.18443
Nab2	XM_235224	Ngfi-A bindingrotein 2	2.64194	27.5581	3.23121	-8.52873		-1.24208	1.11004	-1.08572	-1.20519
Abra	NM_175844	actin-binding Rho activatingrotein	1.5125	22.1982	5.06928	-4.37896		-1.29766	-1.49076	-1.78048	-1.19434
Hdac6	XM_228753	histone deacetylase 6	5.83709	20.2187	11.1629	-1.81124		1	2.11478	1.57623	-1.34167
Cnot6l	XM_341191	CCR4-NOT transcription complex, subunit 6-like	2.16067	19.744	2.29916	-8.58747		1.2115	36.3031	8.45676	-4.29279
Nr4a2	NM_019328	nuclear receptor subfamily 4, group A, member 2	2.01539	4.15047	2.46937	-1.68078		1.11998	1.25388	-1.02471	-1.28487
Zfp189	XM_232972	zinc fingerrotein 189	1.58648	2.71481	2.24877	-1.20725		-1.21664	1.79751	1.13888	-1.57832
Mafk	NM_145673	v-maf musculoaponeurotic fibrosarcoma oncogene family	1.12055	2.37119	1.43839	-1.6485		-1.01853	1.22981	1.0828	-1.13577
Zfp36l1	NM_017172	zinc fingerrotein 36, C3H type-like 1	-1.12895	2.14602	1.28103	-1.67524		-1.01984	1.0303	-1.00208	-1.03244
Zfp287	XM_220549	zinc fingerrotein 287	1.4457	2.00524	1.40486	-1.42736		-8.11065	-1.15553	-4.49424	-3.88932
Ccnl1	NM_053662	cyclin L1	-1.10947	1.94374	1.25799	-1.54512		-1.08009	1.21067	-1.06834	-1.2934
Bcl6	XM_221333	B-cell leukemia/lymphoma 6	1.68993	1.90553	1.95622	1.0266		-1.09151	1.47681	1.13793	-1.2978
Nfatc3	XM_341680	nuclear factor of activated T-cells, calcineurin-dependent 3	1.94983	1.88401	1.62356	-1.16042		-2.62218	1.98142	1.23784	-1.60071
Rlf	XM_233485	rearranged L-myc fusion sequence	-1.04814	1.86515	1.21537	-1.53464		-1.03688	1.12439	1.04399	-1.07701
Ell2	XM_226624	elongation factor RNAolymerase II 2	1.17218	1.80001	1.14364	-1.57393		1.01658	1.26367	-1.04096	-1.31543
Cutl1	XM_347163	cut-like 1 (Drosophila)	1.39084	1.79886	1.34332	-1.33912		1.10187	1.07632	1.02276	-1.05236
Zfp354a	NM_052798	zinc fingerrotein 354A	-1.06701	1.79017	1.11831	-1.60077		1.01684	1.19247	-1.13074	-1.34838
Braf	XM_231692	v-raf murine sarcoma viral oncogene homolog B1	1.03315	1.74849	1.17874	-1.48336		1.03792	1.10559	1.04944	-1.0535
Pawr	NM_033485	PRKC, apoptosis, WT1, regulator	1.25727	1.70528	1.29515	-1.31667		1.01389	1.53901	1.30116	-1.1828
Hmga1	NM_139327	high mobility group AT-hook 1	-1.16139	1.25199	1.24271	-1.00746		1.37172	2.14165	1.80762	-1.18479
Nkx2-6	XM_344429	NK2 transcription factor related, locus 6 (Drosophila)	1.93112	-1.05744	2.52685	2.672		-2.72311	-17.7139	-7.77143	2.27936
Myt1	XM_342605	myelin transcription factor 1	-1.17719	-1.13489	-1.62369	-1.4307		-1.043	-1.82333	-1.31507	1.38649
Pde8a	NM_198767	phosphodiesterase 8A	-1.38013	-1.15752	-1.49923	-1.29521		-1.00092	-2.27041	-2.46698	-1.08658
Hr	NM_024364	hairless homolog (mouse)	-1.22303	-1.34237	-1.5143	-1.12809		-1.08845	-2.00591	-1.22244	1.64091
Nkx6-2	XM_219447	NK6 transcription factor related, locus 2 (Drosophila)	-1.23433	-1.42101	-2.32236	-1.6343		-1.09544	-2.43607	-1.62201	1.50188
Fank1	NM_001008347	fibronectin type 3 and ankyrin repeat domains 1	-1.18777	-1.78281	-1.33701	1.33343		-1.01094	-1.30687	1.02008	1.33311
Zic2	XM_341381	Zic family member 2 (odd-paired homolog, Drosophila)	-1.34427	-1.84575	-2.16566	-1.17332		-1.09962	-1.15211	-1.45892	-1.2663
Nfatc4	XM_240184	nuclear factor of activated T-cells,calcineurin-dependent 4	-1.23218	-2.05178	-2.31705	-1.12928		1.02963	-1.6297	-1.15775	1.40764
Pitx3	NM_019247	paired-like homeodomain transcription factor 3	-3.63438	-2.1267	-2.65037	-1.24623		-1.12535	1.93862	1.31814	-1.47072
Foxl2	XM_345975	forkhead box L2	-1.67731	-2.30714	-2.733	-1.18458		1.16368	-1.74664	-1.59532	1.09486
Hdac7a	XM_345868	histone deacetylase 7A	-1.66091	-3.29684	-2.78387	1.18426		-1.0136	-1.60089	-1.46715	1.09116
Sox18	XM_230968	SRY-box containing gene 18	-1.65316	-7.33089	-4.04106	1.8141		1.1337	-1.24676	-1.07037	1.16479
Ubiquitin
Fbxo33	XM_234205	F-box onlyrotein 33	1.30243	2.21497	1.39757	-1.58487		-1.04372	1.37114	1.13802	-1.20485
Arih1	XM_217157	ariadne ubiquitin-conjugating enzyme E2 bindingrotein homolog 1	1.16327	2.21668	1.37578	-1.61122		1.00207	1.85399	1.1737	-1.57961
Fbxo28	XM_223125	F-box onlyrotein 28	1.23546	1.95909	1.30394	-1.50244		-1.18465	1.54577	1.39355	-1.10923
Fbxl4	XM_232833	F-box and leucine-rich repeatrotein 4	1.09079	-1.09264	-1.18872	-1.08794		-1.15325	-1.90344	-1.17107	1.62538
Zinc Finger
Zbtb40	XM_342953	zinc finger and BTB domain containing 40	1.17614	1.01714	1.13199	1.11291		-1.17853	-1.81682	-1.28569	1.41311
Zc3h6	XM_230592	zinc finger CCCH type containing 6	1.08299	-1.40457	-1.48432	-1.05678		-1.09552	-1.78904	-1.32041	1.35491
Zfp688	XM_215090	zinc fingerrotein 688	-1.35337	-1.70713	-2.48015	-1.45282		-1.03769	-1.86232	-1.36863	1.36072
Znf167	XM_343509	zinc fingerrotein 167	1.14508	-2.59883	2.26854	5.89555		-3.46086	-28.4959	-7.04625	4.04413
Miscellaneous
Ccdc49	XM_340890	coiled-coil domain containing 49	-2.84291	1.99027	1.23765	-1.60811		-1.74667	1.34585	1.00544	-1.33857
Wdr50	XM_220851	WD repeat domain 50	-1.12599	-1.06953	-1.23799	-1.15752		1.01222	-1.8953	-1.18422	1.60046
Mppe1	XM_341627	metallophosphoesterase 1	-1.03156	-1.21715	-1.35211	-1.11088		-1.0542	-2.05564	-1.23476	1.66481
Ixl	XM_214868	intersex-like (Drosophila)	-1.27775	-1.34424	-1.53806	-1.14419		-1.0593	-1.95134	-1.2462	1.56584
Cc2d1b	XM_233342	coiled-coil and C2 domain containing 1B	-1.39852	-1.7146	-1.92733	-1.12407		-1.04801	-1.4987	-1.14762	1.30591
Mrvldc1	XM_219885	MARVEL (membrane-associating) domain containing 1	1.1379	-1.73896	-1.28256	1.35585		-1.01904	-1.14364	-1.1912	-1.04159
Dsm-1	XM_576518	D-serine modulator-1	-1.40884	-1.74792	-1.73472	1.0076		1.04589	-1.76316	-1.36696	1.28984
Chtf18	XM_213250	CTF18, chromosome transmission fidelity factor 18 homolog	-2.10344	-2.19908	-4.59958	-2.09159		-1.03108	-2.30705	-1.46919	1.57028
Crispld1	XM_237258	cysteine-rich secretoryrotein LCCL domain containing 1	-1.22431	-2.59489	1.31543	3.41339		1.65389	-25.6212	-7.5809	3.3797
Rsb66	NM_181694	Rsb-66rotein	-6.33848	-31.217	-5.35309	5.83158		-1.01534	-1.19697	-1.04529	1.14511
LOC's
LOC498201	XM_573419	Rattus norvegicus hypothetical LOC498201	2.19409	17.7374	3.63458	-4.88019		1.42266	1.28561	-1.65858	-2.13227
LOC498675	XM_573957	Rattus norvegicus hypothetical LOC498675	1.02137	2.99258	1.63634	-1.82882		-1.02926	2.10255	1.30158	-1.61538
LOC365972	XM_345307	sim_betaine-homocysteine methyltransferase 2	9.12789	2.13187	9.42856	4.42267		-28.3112	-15.0469	-5.46589	2.75287
LOC310395	XM_227134	sim_Nocturnin (CCR4rotein homolog)	1.00764	2.08641	1.42246	-1.46676		-1.16914	1.68154	1.08819	-1.54526
RGD1309752	XM_237184	sim_hyp_rotein D630010C10	1.08181	2.01274	1.72412	-1.1674		-1.04229	1.78719	1.30518	-1.36931
LOC246295	XM_575968	glycine-, glutamate-, thienylcyclohexylpiperidine-bindingrotein	18.038	1.99396	-1.13664	-2.26641		-3.3567	-16.3208	-13.5931	1.20067
MGC95208	NM_001005552	sim_4930453N24Rikrotein	1.15214	1.97531	1.2473	-1.58367		1.05502	1.46142	1.07654	-1.35752
LOC501329	XM_576740	Rattus norvegicus hypothetical LOC501329	1.14601	1.93234	1.16221	-1.66265		1.03595	-2.07666	-2.18727	-1.05327
LOC501194	XM_576622	Rattus norvegicus hypothetical LOC501194	1.10591	1.73857	1.95022	1.12174		-1.06736	1.3551	-1.03388	-1.40101
LOC361346	XM_346963	sim_chromosome 18 open reading frame 54	1.09913	1.25379	1.1937	-1.05034		-1.06004	1.79412	1.18341	-1.51606
MGC125086	XM_573980	sim_RIKEN cDNA 5133401N09	1.17788	1.04909	-1.00114	-1.05028		-1.07133	-1.92674	-2.07099	-1.07487
LOC362802	XM_343129	sim_chromosome 18 open reading frame 54	-1.02666	-1.06331	-1.23702	-1.16337		-1.19126	-1.737	-1.31663	1.31928
Poll	XM_342058	polymerase (DNA directed), lambda	1.0419	-1.18039	-1.40074	-1.18668		-1.19798	-1.75823	-1.25688	1.39889
LOC497933	XM_573120	sim_solute carrier family 25, member 35	-1.50401	-1.29044	-1.42341	-1.10304		1.03916	-1.95605	-1.16545	1.67836
RGD1559786	XM_216480	sim_RIKEN cDNA 0610037L13	-1.21768	-1.34812	-1.36801	-1.01475		-1.13191	-1.7145	-1.22036	1.40491
LOC362681	XM_342996	sim_pseudouridylate synthase-like 1	-1.54168	-1.37834	-1.10759	1.24445		-1.33813	-1.76614	-1.49377	1.18234
LOC303731	XM_221186	Chromoboxrotein homolog 8	-1.23092	-1.41453	-1.35237	1.04596		-1.12494	-1.70988	-1.24416	1.37433
LOC363336	XM_343674	hyp_ LOC363336	1.21484	-1.47612	-4.14272	-2.80649		-2.23466	-2.24854	-2.79019	-1.24089
LOC500300	XM_575649	sim_hyp_rotein MGC6835	-1.22629	-1.66155	-1.39171	1.19389		-1.05277	1.81867	1.48736	-1.22275
LOC313450	XM_233313	sim_RIKEN cDNA 2810428C21	-1.15156	-1.70724	-1.19672	1.42659		-1.09572	-1.14278	-1.1085	1.03092
LOC498662	XM_573943	sim_RIKEN cDNA 2610019F03	-1.2228	-1.7301	-1.54418	1.1204		-1.17752	-1.08785	-1.12584	-1.03493
MGC94010	NM_001007732	sim_SPI6	-1.28237	-1.77275	-2.00836	-1.13291		1.05277	-1.76779	-1.56728	1.12793
LOC311123	XM_230017	sim_RIKEN cDNA 4930506L13	1.00072	-1.89412	-1.21525	1.55863		-1.57281	-1.24501	-1.02536	1.21422
LOC286985	NM_173319	putativeheromone receptor (Go-VN7)	-1.61154	-1.9109	-1.69563	1.12695		1.1014	-1.03981	-1.16065	-1.11621
LOC311548	XM_230741	sim_RIKEN cDNA 4930509O20	1.09736	-6.62228	-3.52441	1.87897		-1.33408	-2.6128	-2.12302	1.2307
LOC311020	XM_229915	sim to RIKEN cDNA 0610033I05	-8.06778	-17.403	-6.93826	2.50827		-2.63144	1.6593	-4.97237	-8.25067
RGD's
RGD1305423	XM_221021	sim to CG32580-PA	8.42715	19.1407	11.1918	-1.71024		-1.4474	-1.74269	-1.28374	1.35751
RGD1359349	NM_001007738	sim to hypotheticalrotein MGC34760	3.72836	7.92859	14.6326	1.84554		-1.23235	6.74298	5.75813	-1.17104
RGD1565743	XM_577271	sim_dihydropyridine sensitive calcium channel	1.94728	3.24587	2.34391	-1.38481		-6.24626	-2.88017	-11.9004	-4.13184
RGD1310835	XM_213702	hyp_ LOC288447	1.62808	3.0213	1.8739	-1.61231		2.40419	2.75201	2.90223	1.05459
RGD1359509	NM_001009671	sim_hyp_rotein FLJ13448	1.00655	2.93472	2.51856	-1.16524		-1.28569	1.65691	1.00638	-1.64641
RGD1308695	XM_213894	sim_RIKEN cDNA 1200016B10	1.25597	2.779	1.84347	-1.50748		1.10668	1.80699	1.1755	-1.53721
RGD1310311	XM_343071	sim_chromosome 14 open reading frame 104	-1.06477	2.24989	1.44613	-1.5558		-1.14022	1.44739	1.11419	-1.29905
RGD1305179	XM_214648	sim_Nedd4 bindingrotein 1	1.15932	2.21935	1.649	-1.34588		1.00437	1.61115	1.07098	-1.50436
RGD1309969	XM_342471	sim_RIKEN cDNA 2600010E01	1.07077	2.15733	1.22792	-1.7569		-1.20554	-1.31111	-1.04879	1.25011
Errfi1	XM_233692	ERBB receptor feedback inhibitor 1	1.70587	2.01599	2.0957	1.03954		-1.03626	1.4868	1.04586	-1.4216
RGD1304626	XM_224672	sim_KIAA1128rotein	1.0805	1.92127	1.71502	-1.12026		-1.29937	-1.84049	-1.47597	1.24697
RGD1311456	XM_343420	sim_RIKEN cDNA B230380D07	1.4008	1.90529	1.15058	-1.65593		-1.03686	-1.01051	1.22815	1.24106
RGD1308706	XM_214649	sim_RIKEN cDNA 4921524J17	-1.08086	1.90376	1.30131	-1.46296		-1.04826	1.70479	1.04879	-1.62548
RGD1562716	XM_575602	sim_T-complexrotein 1, alpha subunit (TCP-1-alpha) (CCT-alpha)	-1.1333	1.87453	1.35171	-1.38678		1.26557	1.23507	1.08016	-1.14341
RGD1310250	XM_345234	sim_hyp_rotein	1.24216	1.87357	1.41863	-1.32069		9.8997	1.91036	2.01187	1.05314
RGD1561255	XM_216905	sim_Leucine-rich and immunoglobulin-like domains 3	1.18189	1.84745	1.511	-1.22266		1.08895	1.08021	-1.10201	-1.19041
RGD1564940	XM_575773	sim_RIKEN cDNA 3000004N20	1.34556	1.73054	1.65723	-1.04423		-1.1091	1.75723	1.04803	-1.6767
RGD1305255	XM_235191	sim_CG3996-PA	1.24454	1.71014	1.49357	-1.145		1.16172	1.60563	1.26848	-1.26579
RGD1563870	XM_576297	sim_CG3104-PA, isoform A	1.48831	1.58975	-1.16664	-1.85466		-1.95736	-101.767	-15.7072	6.47903
RGD1566085	XM_342112	sim_pyridoxal (pyridoxine, vitamin B6) kinase	1.02786	1.46573	1.10293	-1.32895		1.02264	2.46524	1.52852	-1.61283
RGD1560677	XM_573890	sim_dentinhosphoryn	-1.46076	1.3731	2.01358	1.46645		-4.882	-33.2109	-8.41294	3.94759
RGD1561106	XM_228749	sim_ferritin heavy chain - chicken	1.72601	1.25862	1	-1.25862		-9.97598	-16.0792	-3.62485	4.43582
RGD1305347	XM_342895	sim_RIKEN cDNA 2610528J11	-1.03049	1.05968	-1.46205	-1.54931		-1.35685	-2.13926	-1.88424	1.13534
RGD1310383	XM_222189	sim_T-cell activationroteinhosphatase 2C	1.19741	1.01291	1.13791	1.12341		1.16844	1.70028	1.19416	-1.42383
RGD1560850	XM_573119	sim_Expressed sequence BB220380	2.07747	1	1	1		1.11822	19.014	6.14452	-3.09447
RGD1306939	XM_225319	sim_mKIAA0386rotein	-1.10052	-1.00063	-1.05907	-1.05841		1.00402	1.88646	1.45935	-1.29267
RGD1560576	XM_214434	sim_PC-LKC generoduct	-1.0317	-1.00426	-1.12325	-1.11849		-1.16211	-1.74323	-1.50145	1.16103
RGD1311053	XM_224643	sim_double homeoboxrotein	-1.00285	-1.06431	-1.17955	-1.10828		-1.39373	-1.90395	-1.56287	1.21824
RGD1311463	XM_230362	sim_RIKEN cDNA 2700007P21	-1.10067	-1.08451	-1.24008	-1.14345		-1.0542	-1.70094	-1.17796	1.44397
RGD1564784	XM_574833	sim_Zinc finger, FYVE domain containing 16	1.03473	-1.12614	-1.34672	-1.19587		-1.01364	-1.89405	-1.31704	1.43811
RGD1304885	XM_215597	sim_SH3 domainrotein D19	1.01349	-1.12909	-1.29862	-1.15015		-1.22958	-1.87153	-1.39927	1.3375
RGD1311005	XM_341099	sim_J-type co-chaperone HSC20	-1.25791	-1.15249	-1.4132	-1.22622		-1.04602	-1.80102	-1.18868	1.51514
RGD1309326	XM_218608	sim_RIKEN cDNA 2410002F23	-1.13524	-1.16331	-1.21681	-1.04599		-1.08346	-1.73058	-1.42286	1.21627
RGD1308581	XM_341181	sim_RIKEN cDNA 2900024C23	-1.29116	-1.22402	-1.37737	-1.12528		-1.08854	-1.77712	-1.19598	1.48592
Ift80	XM_215577	intraflagellar transport 80 homolog (Chlamydomonas)	-1.06349	-1.23545	-1.27374	-1.03099		-1.05887	-1.72751	-1.22133	1.41446
RGD1563215	XM_233199	sim_cytochrome450, family 2, subfamily J,olypeptide 4	-1.3183	-1.26735	-1.86541	-1.47189		-1.16429	-2.03149	-1.32931	1.52823
RGD1308123	NM_001009664	sim_hyp_rotein MGC15716	-1.30884	-1.29232	-1.48693	-1.15059		-1.07091	-1.7589	-1.262	1.39374
RGD1560636	XM_223587	sim_novelrotein	-1.06868	-1.39519	-1.38781	1.00532		-1.03701	-2.01921	-1.31538	1.53508
RGD1306001	XM_343305	sim_2210021J22Rikrotein	-1.2341	-1.40213	-1.41586	-1.00979		-1.0564	-1.72067	-1.2679	1.3571
RGD1561025	XM_341155	sim_kelch/ankyrin repeat containing cyclin A1 interactingrotein	-1.44335	-1.41991	-1.52468	-1.07379		-1.05451	-2.02122	-1.28079	1.5781
RGD1560519	XM_233829	sim_thyroid adenoma associated	-1.15587	-1.43475	-1.24907	1.14865		-1.23938	-1.80702	-1.30337	1.38642
RGD1560166	XM_576464	sim_Probable G-protein coupled receptor 62 (hGPCR8)	-1.29873	-1.45659	-1.34136	1.08591		-1.2525	-2.2031	-1.31812	1.6714
RGD1566001	XM_575888	sim_DNA segment, Chr 4, Brigham & Womens Genetics 0951	-1.76144	-1.47541	-2.81274	-1.90641		1.00322	-5.67681	-2.72314	2.08465
RGD1563962	XM_574959	sim_Mss4rotein	-1.25041	-1.49356	-1.53455	-1.02745		-1.0043	-1.8193	-1.33987	1.35782
RGD1311142	XM_341847	sim_hyp_rotein FLJ32796	-1.37965	-1.53023	-1.34455	1.1381		1.05658	-1.92909	-1.2886	1.49704
RGD1311937	XM_233470	sim_hyp_rotein MGC17299	-1.50525	-1.58825	-1.88985	-1.1899		-1.06054	-1.73906	-1.44507	1.20345
RGD1308904	XM_230719	sim_RIKEN cDNA 5430432M24	-1.31896	-1.71918	-1.05052	1.6365		-1.23727	-1.89097	-1.42989	1.32246
RGD1565571	XM_573413	sim_meningioma 1	-1.52204	-1.72755	-2.27218	-1.31526		-1.37748	-4.75752	1.09274	5.19874
RGD1309655	XM_213503	sim_RIKEN cDNA 4732496G21 gene	-1.18451	-1.73955	-1.48313	1.17289		-1.01332	-1.57093	-1.39883	1.12303
RGD1564259	XM_218081	sim_OTTHUMP00000040155	-1.56932	-1.77843	-1.70048	1.04584		1.01816	-1.08751	-1.10451	-1.01563
RGD1565166	XM_213215	sim_MGC45438rotein	-1.95599	-1.94996	-1.78962	1.08959		1.16716	-1.59419	-1.17689	1.35458
RGD1306592	XM_345164	sim_Agrin	-1.38563	-1.96655	-1.50074	1.31039		1.05351	-2.60432	-1.7738	1.46821
RGD1307119	XM_221198	hyp_ LOC303743	-1.35274	-2.0064	-1.97972	1.01347		1.021	-1.89824	-1.27649	1.48708
RGD1562012	XM_579762	RGD1562012	-2.8695	-2.05433	-1.77832	1.15521		-1.14244	-4.58401	-1.20379	3.80798
RGD1310039	XM_342041	sim_hyp_rotein FLJ10058	-1.2062	-2.07141	-1.93848	1.06858		1.01469	-2.2346	-1.39959	1.59661
RGD1305779	XM_234036	sim_NSE1	-1.16914	-2.08961	1.22465	2.55905		1.32254	2.6474	1.63167	-1.62251
RGD1308746	XM_343444	sim_Down syndrome critical regionrotein 6	-1.55076	-2.0968	-3.55703	-1.69641		-1.03165	-3.20853	-1.2883	2.49051
Tmem123	XM_343346	transmembranerotein 123	-1.25052	-2.15288	-1.9024	1.13167		-1.14596	-1.29161	-1.28897	1.00204
RGD1565059	XM_574953	sim_hyp_rotein E130311K13	-1.03009	-2.15975	-1.64915	1.30962		-1.00764	-1.58038	-1.02903	1.53579
RGD1563255	XM_576176	sim_PDZ-domainrotein Gipc3	-1.22783	-2.19812	-1.6484	1.33348		1.15941	-1.5797	-1.08901	1.45058
RGD1561694	XM_573625	sim_High mobility grouprotein 2 (HMG-2)	-1.63385	-2.40815	-1.69473	1.42096		-1.11051	-1.22667	-1.08172	1.134
RGD1563200	XM_576349	sim_CDNA sequence BC048502	-1.57805	-3.96605	-12.1386	-3.06063		-13.2026	-15.3198	-3.90842	3.9197
RGD1564296	XM_577971	sim_Ac1147	1.74402	-4.77652	-5.00981	-1.04884		-1.05514	-6.54151	-1.35574	4.82503
RGD1560424	XM_233601	sim_Peptidyl arginine deiminase, egg and embryo abundant	1.28457	-13.768	-22.448	-1.63045		-4.6352	1.46773	-7.386	-10.8406
RGD1306072	XM_222458	hyp_ LOC304654	-5.33219	-37.1641	-8.02076	4.63349		1.20669	-1.1805	-1.14513	1.03088
RGD1308117	XM_341349	sim_9930012K11Rikrotein	-2.42242	-38.362	-22.6352	1.69479		1.07649	-1.32056	-1.05042	1.25716
RGD1564729	XM_574811	sim_Grotein-coupled receptor 150	-1.49408	-141.837	-32.2517	4.39782		-2.59662	-1.86264	-3.70837	-1.99092
The data in this table show the rest of the 545 METH-responsive genes that were not influenced by SCH23390 treatment.
The genes are grouped according to their functional classifications.
